# Supplementary material
Source: publisher figshare collection journal article supplement (https://sage.figshare.com/ndownloader/files/17797628)
Supplement: Supplementary file 1 [file 17797628]

Veterinary Pathology: Supplemental Materials.  
 Ushio et al. Chronic Inflammatory and Proliferative Lesions  
 of the Gallbladder in Aged Pigs.

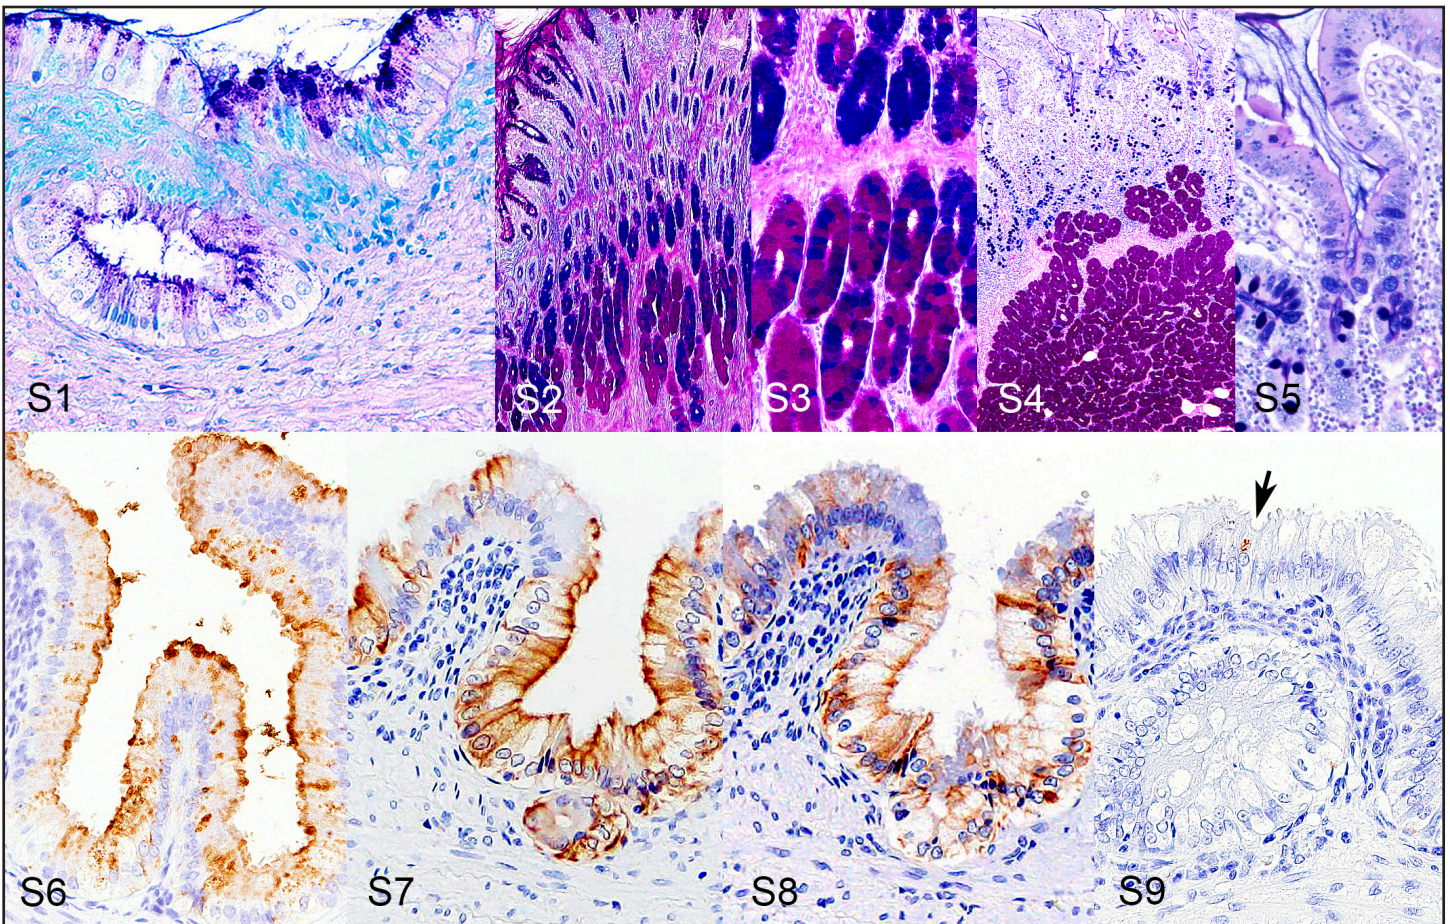

- Supplemental Figure S1. Normal mucosa, gallbladder, pig, 1-year-old. Surface epithelial cells and glandular cells of the normal gallbladder mucosa are stained purple at the luminal surface and in the cytoplasm. Alcian blue and Periodic acid-Schiff double staining (AB-PAS).
- Supplemental Figure S2. Normal mucosa, pylorus, pig, 1-year-old. Surface epithelial cells are stained magenta, while pyloric glands are stained magenta and blue. AB-PAS.
- Supplemental Figure S3. Normal mucosa, pylorus, pig, 1-year-old. Higher magnification of the pyloric glands. A pyloric gland is stained in a mosaic pattern of magenta and blue. AB-PAS.
- Supplemental Figure S4. Normal mucosa, duodenum, pig, 1-year-old. AB-PAS. Goblet cells are stained purple. Duodenal glands are stained magenta. AB-PAS.
- Supplemental Figure S5. Normal mucosa, duodenum, pig, 1-year-old. Higher magnification of the surface epithelium. Brush border of the surface epithelial cells is stained magenta and the cytoplasm of the goblet cells is stained purple. AB-PAS.
- Supplemental Figure S6. Normal mucosa, gallbladder, pig, 1-year-old. The cytoplasm and the luminal side of surface epithelial cells and glandular cells are positive for mucin (MUC) 5AC. Immunohistochemistry (IHC) for MUC5AC.
- Supplemental Figure S7. Normal mucosa, gallbladder, pig, 1-year-old. Surface epithelial cells and glandular acinar cells are positive for cytokeratin (CK) 19. IHC for CK19.
- Supplemental Figure S8. Normal mucosa, gallbladder, pig, 1-year-old. Surface epithelial cells and glandular acinar cells are positive for CK20. IHC for CK20.
- Supplemental Figure S9. Normal mucosa, gallbladder, pig, 1-year-old. Chromogranin A-positive granules in few epithelial cells. IHC for chromogranin A.



Veterinary Pathology: Supplemental Materials.  
Ushio et al. Chronic Inflammatory and Proliferative Lesions  
of the Gallbladder in Aged Pigs.

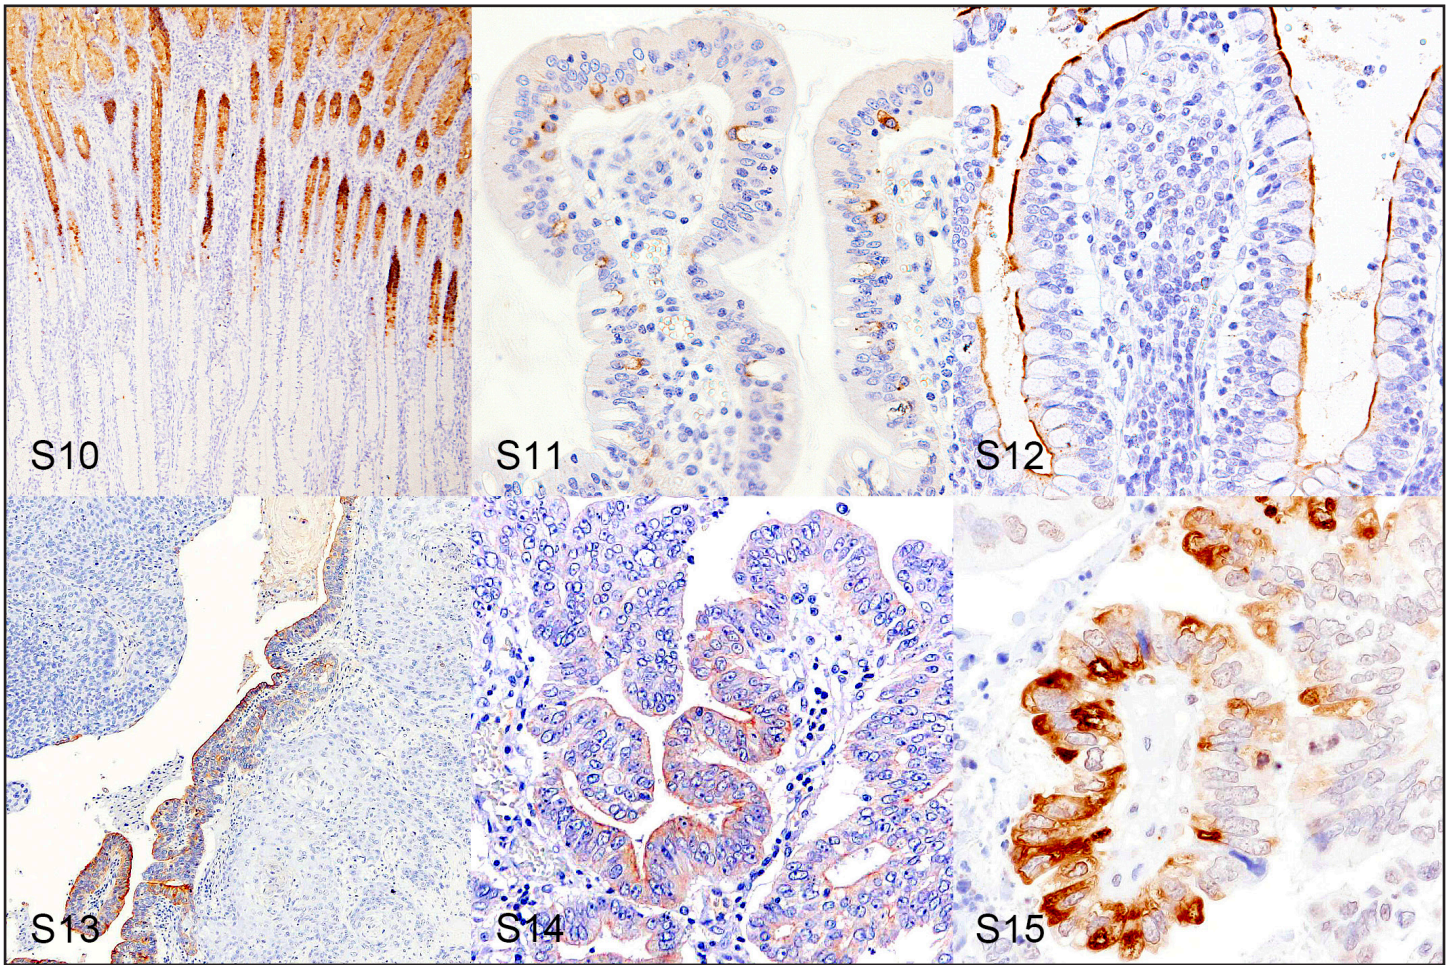

Supplemental Figure S10. Normal mucosa, pylorus, pig, 1-year-old. Surface epithelial cells are positive for mucin (MUC) 5AC, but glandular cells of pyloric glands are negative. Immunohistochemistry (IHC) for MUC5AC.

Supplemental Figure S11. Normal mucosa, duodenum, pig, 1-year-old. Goblet cells are positive for MUC2. IHC for MUC2.

Supplemental Figure S12. Normal mucosa, duodenum, pig, 1-year-old. Brush border of the surface epithelial cells is positive for CD10. IHC for CD10.

Supplemental Figure S13. Adenocarcinoma, gallbladder, pig, case 9. The mucosal epithelial cells are positive for cytokeratin (CK) 19 in papillary lesions. IHC for CK19.

Supplemental Figure S14. Adenocarcinoma, gallbladder, pig, case 9. Some mucosal epithelial cells are positive for CK20. IHC for CK20.

Supplemental Figure S15. Adenocarcinoma, gallbladder, pig, case 9. Some mucosal epithelial cells are positive for chromogranin A. IHC for chromogranin A.
